# Supplementary material
Source: PubMed Central journal article supplement (PMC5820184)
Supplement: NIHMS928803-supplement-Supplement.pdf [file NIHMS928803-supplement-Supplement.pdf]

| <b>Contacted Author</b>                | <b>Institution</b>                | <b>CASP Target ID</b>                              |
|----------------------------------------|-----------------------------------|----------------------------------------------------|
| Ricardo Aparicio                       | U Campinas, Brasil                | T0864                                              |
| Arnaud Basle                           | U Newcastle, UK                   | T0912                                              |
| Martino Bolognesi                      | U Milano, Italy                   | T0883, T0887                                       |
| Badri Dubey, Tilman Schirmer           | U Basel, Switzerland              | T0893                                              |
| Eleonore von Castelmur                 | NCI, Amsterdam, Netherlands       | T0874, T0875, T0876                                |
| Oliver Clarke                          | U Columbia, New York, USA         | T0863                                              |
| Ron Diskin                             | Weizmann, Israel                  | T0877                                              |
| Damian Ekiert                          | UC San Francisco, California, USA | T0866, T0918                                       |
| Celia Goulding                         | UC Irvine, California, USA        | T0861/T0862/T0870, T0868/T0869, T0914/T0915, T0891 |
| Christian Griesinger                   | Max Planc, Germany                | T0865                                              |
| Stefan Grotzinger                      | KAUST, Saudi Arabia               | T0917                                              |
| Marcus Hartmann                        | U Tübingen, Germany               | T0890                                              |
| Osnat Herzberg                         | U Maryland, Maryland, USA         | T0948                                              |
| Choel Kim                              | BCM, Texas, USA                   | T0910                                              |
| Leila Lo Leggio                        | U Copenhagen, Denmark             | T0889                                              |
| Don Lorimer                            | U Washington, USA                 | T0878                                              |
| Andrew Lovering                        | U Birmingham, UK                  | T0896, T0899, T0901, T0905, T0941, T0942, T0947    |
| Marina Mapelli                         | IEO, Italy                        | T0903/T0904                                        |
| Brian Marsden                          | SGC (Oxford, UK; Toronto, Canada) | T0882, T0928, T0943, T0944, T0945                  |
| Karolina Michalska, Andrzej Joachimiak | Argonne Lab, Illinois, USA        | T0884/T0885, T0894/T0895                           |
| Shabir Najmudin                        | U Lisbon, Portugal                | T0900, T0921/T0922, T0923                          |
| Mohamed Noor                           | U Limerick, Ireland               | T0906                                              |
| Tom Peat                               | CSIRO, Australia                  | T0913                                              |
| George Phillips                        | Rice U, Texas, USA                | T0871, T0873                                       |
| Phani Pokkuluri                        | Argonne Lab, Illinois, USA        | T0920                                              |
| Sandra Postel, Eric Sundberg           | U Maryland, Maryland, USA         | T0886                                              |
| Mark van Raaij                         | CSIS, Spain                       | T0860, T0867, T0880, T0881, T0888, T0909, T0946    |
| Alain Roussel                          | U Marseille, France               | T0907                                              |
| Pietro Roversi                         | U Oxford, UK                      | T0892                                              |
| Robert Stroud                          | UC San Francisco, California, USA | T0911                                              |
| Kemin Tan, Andrzej Joachimiak          | Argonne Lab, Illinois, USA        | T0872, T0879, T0897/T0898                          |
| Kaspars Tars                           | U Latvia, Riga, Latvia            | T0859                                              |
| Hong Zhou                              | UC Los Angeles, USA               | T0902                                              |
|                                        |                                   |                                                    |
|                                        |                                   |                                                    |
